# Supplementary material
Source: ML conference proceedings conference paper supplement (https://proceedings.neurips.cc/paper_files/paper/2018/hash/5abdf8b8520b71f3a528c7547ee92428-Abstract.html)
Supplement: Supplementary file [file 5abdf8b8520b71f3a528c7547ee92428-Supplemental.zip]

## 6 Appendix

### 6.1 Manifold

**Proposition 10.** *If  $S(x, \theta)$  is differentiable with respect to  $x$  and  $\nabla_x S(x, \theta) \neq 0$  throughout  $B_\theta$ ,  $B_\theta$  is an  $(d - 1)$ -dimensional differentiable manifold and has measure zero.*

*Proof.* For any point  $b \in B_\theta$ , since  $\nabla_x S(x, \theta) \neq 0$ , there is some direction where  $\nabla_x S(x, \theta)$  is non-zero. By the implicit function theorem, this means that there is a differentiable mapping from a subset of  $\mathbb{R}^{d-1}$  to a neighborhood of  $b$  within  $B_\theta$ . Thus,  $B_\theta$  is a  $(d - 1)$ -dimensional differentiable manifold. Further, in  $\mathbb{R}^d$ , every open cover has a countable subcover. Thus, there is a countable family of local patches (with local differentiable charts). Since each local patch is a continuous mapping from a measure zero set  $\mathbb{R}^{d-1}$ , the local patches have measure zero. Since a countable union of measure zero sets has measure zero,  $B_\theta$  has measure zero.  $\square$

### 6.2 Important Lemma

**Lemma 11.** *Suppose  $\theta \in \Theta_{\text{regular}}$  and Assumption 7 holds. If  $g(x)$  is smooth and has bounded support,*

$$F(s) = \int_{S(x, \theta) < s} g(x) dx \quad (15)$$

*is smooth at 0.*

*Proof.* For this proof, we rely heavily on the arguments in Hoveijn (2007)

Since  $g(x)$  has bounded support, for  $\|x\| \geq M_x$ ,  $g(x) = 0$ . Intuitively, this means we can define a function that is equal to  $S(x, \theta)$  for  $\|x\| \leq M_x$  and is a small value  $\|x\| \geq M_x$  and mollify to make it smooth. More precisely, let  $S_{\min} = \min(-2, \min_{\|x\| < 2M_x} S(x, \theta))$ . Define  $f(x)$  to be equal to  $S(x, \theta)$  inside a ball of radius  $2M_x$  and equal to  $S_{\min}$  outside. Then mollify the function between balls of radius  $M_x$  and  $2M_x$ . If we shift the function by  $S_{\min}$ , the function is smooth, always positive, and vanishes at infinity. Thus, it satisfies the Shifted class C functions of Definition 2 of Hoveijn (2007).

Then, we can examine the function

$$G(s) = \int_{-1 < f(x) < s} g(x) dx, \quad (16)$$

which will have the same derivatives (if they exist) as  $F(s)$  around 0. Note that  $S_{\min} \leq -2 < -1$ , so the integration between the level sets is well-defined.

0 is a regular value because  $\theta \in \Theta_{\text{regular}}$ . Further, we don't need the non-degeneracy conditions of Hoveijn (2007) because  $\nabla_x S(x, \theta)$  is continuous (Assumption 7) on a compact set (the support of  $g(x)$ ) and thus is bounded below. And thus, a neighborhood around 0 are regular values.

We can use the flow box and diffeomorphism argument from Hoveijn (2007) to express the volume function as an integral with  $h$  as the upper limit (see Proposition 7 of Hoveijn (2007)). While Hoveijn (2007) uses 1 as the integrand, the same argument holds for  $g(x)$  as the integrand, and we recover that since  $g(x)$  is smooth, the integral is smooth.  $\square$

### 6.3 Decision Boundary Density

**Proposition 12.** *If  $\theta \in \Theta_{\text{regular}}$  and Assumptions 5, 6 and 7 hold, then  $b(\theta)$  exists.*

*Proof.* The existence of  $b(\theta)$  will follow from Lemma 11.

Define

$$F(s) = \int_{S(x, \theta) < s} p^*(x) dx \quad (17)$$

$$= \Pr_{x \sim p^*} [S(x, \theta) < s] \quad (18)$$

then  $b(\theta) = F'(0)$  which exists by Lemma 11.

□

### 6.3.1 Gradient of $Z$

**Lemma 13.**

$$\nabla Z(\theta) = -\frac{1}{2} \lim_{s \rightarrow 0} \frac{1}{s} \int_{|S(x, \theta)| \leq s} \nabla_{\theta} S(x, \theta) \mathbb{E}[y|x] p(x) dx \quad (19)$$

*Proof.* The model classifies correctly when  $S(x, \theta)y > 0$  and classifies incorrectly when  $S(x, \theta)y < 0$

$$\nabla Z(\theta) \cdot a = \lim_{h \rightarrow 0} \frac{1}{2h} (Z(\theta + ha) - Z(\theta - ha)) \quad (20)$$

$$= \lim_{h \rightarrow 0} \frac{1}{2h} \left[ \int_{S(x, \theta + ha) > 0} \Pr[y = -1|x] dp(x) + \int_{S(x, \theta + ha) < 0} \Pr[y = 1|x] dp(x) - \right. \quad (21)$$

$$\left. - \int_{S(x, \theta - ha) > 0} \Pr[y = -1|x] dp(x) - \int_{S(x, \theta - ha) < 0} \Pr[y = 1|x] dp(x) \right] \quad (22)$$

$$= \lim_{h \rightarrow 0} \frac{1}{2h} \left[ \int_{S(x, \theta + ha) < 0, S(x, \theta - ha) < 0} (\Pr[y = 1|x] - \Pr[y = 1|x]) dp(x) + \right. \quad (23)$$

$$\left. + \int_{S(x, \theta + ha) > 0, S(x, \theta - ha) < 0} (\Pr[y = -1|x] - \Pr[y = 1|x]) dp(x) + \right. \quad (24)$$

$$\left. + \int_{S(x, \theta + ha) < 0, S(x, \theta - ha) > 0} (\Pr[y = 1|x] - \Pr[y = -1|x]) dp(x) + \right. \quad (25)$$

$$\left. + \int_{S(x, \theta + ha) > 0, S(x, \theta - ha) > 0} (\Pr[y = -1|x] - \Pr[y = -1|x]) dp(x) \right] \quad (26)$$

$$= \lim_{h \rightarrow 0} \frac{1}{2h} \left[ \int_{S(x, \theta + ha) < 0, S(x, \theta - ha) > 0} \mathbb{E}[y|x] dp(x) - \int_{S(x, \theta + ha) > 0, S(x, \theta - ha) < 0} \mathbb{E}[y|x] dp(x) \right] \quad (27)$$

Applying Taylor's theorem,

$$\nabla Z(\theta) \cdot a = \lim_{h \rightarrow 0} \frac{1}{2h} \left[ \int_{|S(x, \theta)| < -ha \cdot \nabla_{\theta} S(x, \theta) + O(h^2)} \mathbb{E}[y|x] dp(x) - \int_{|S(x, \theta)| < ha \cdot \nabla_{\theta} S(x, \theta) + O(h^2)} \mathbb{E}[y|x] dp(x) \right] \quad (28)$$

Because  $h \rightarrow 0$ ,

$$\nabla Z(\theta) \cdot a = \lim_{h \rightarrow 0} \frac{1}{2h} \left[ \int_{|S(x, \theta)| < -ha \cdot \nabla_{\theta} S(x, \theta)} \mathbb{E}[y|x] dp(x) - \int_{|S(x, \theta)| < ha \cdot \nabla_{\theta} S(x, \theta)} \mathbb{E}[y|x] dp(x) \right] \quad (29)$$

$$\nabla Z(\theta) \cdot a = \lim_{h \rightarrow 0} \int_{|S(x, \theta)| < |ha \cdot \nabla_\theta S(x, \theta)|} \frac{-\text{sgn}(ha \cdot \nabla_\theta S(x, \theta))}{2h} \mathbb{E}[y|x] dp(x) \quad (30)$$

$$\nabla Z(\theta) \cdot a = -\frac{1}{2} \lim_{h \rightarrow 0} \int_{|S(x, \theta)| < |ha \cdot \nabla_\theta S(x, \theta)|} \frac{1}{|ha \cdot \nabla_\theta S(x, \theta)|} a \cdot \nabla_\theta S(x, \theta) \mathbb{E}[y|x] dp(x) \quad (31)$$

$$\nabla Z(\theta) \cdot a = -\frac{1}{2} \lim_{s \rightarrow 0} \int_{|S(x, \theta)| < s} \frac{1}{s} a \cdot \nabla_\theta S(x, \theta) \mathbb{E}[y|x] dp(x) \quad (32)$$

$$\nabla Z(\theta) \cdot a = a \cdot -\frac{1}{2} \lim_{s \rightarrow 0} \frac{1}{s} \int_{|S(x, \theta)| < s} \nabla_\theta S(x, \theta) \mathbb{E}[y|x] dp(x) \quad (33)$$

$$(34)$$

And thus,

$$\nabla Z(\theta) = -\frac{1}{2} \lim_{s \rightarrow 0} \frac{1}{s} \int_{|S(x, \theta)| < s} \nabla_\theta S(x, \theta) \mathbb{E}[y|x] dp(x) \quad (35)$$

□

#### 6.4 Expected gradient of loss for uncertainty sampling

**Theorem 8.** *If Assumptions 2, 5, 6, and 7 hold and  $\theta \in \Theta_{\text{regular}}$  and  $b(\theta) \neq 0$ , then if  $z^{(t)}$  is chosen via uncertainty sampling with the parameters  $\theta$ ,*

$$\lim_{n_{\text{minipool}} \rightarrow \infty} \mathbb{E}[\nabla \ell(z^{(t)}, \theta)] = \frac{-\psi'(0)}{b(\theta)} \nabla Z(\theta). \quad (36)$$

*Proof.* We can decompose drawing the closest point as first drawing an absolute value of the score  $s_2$  that is the *second closest* to 0 and then drawing the closest point conditioned on that score, which will be according to  $p^*(x, y)$  among the  $x$  with  $|S(x, \theta)| \leq s_2$ .

Let  $r(s) = \mathbb{E}_{|S(x, \theta)| \leq s} [\mathbb{E}_{y|x} [\nabla_\theta \ell((x, y), \theta)]]$ . As long as  $s > 0$  and  $P(|S(x, \theta)| \leq s) > 0$ , it is well-defined quantity since  $\nabla_\theta \ell(z^{(t)}; \theta) < M_\ell$ . However, if  $P(|S(x, \theta)| \leq s) = 0$  for  $s > 0$ , then  $b(\theta) = 0$  (which we assumed is not the case). Thus, for  $s > 0$ ,  $r(s)$  is defined.

$$\lim_{n_{\text{minipool}} \rightarrow \infty} \mathbb{E}[\nabla \ell(z^{(t)}; \theta)] = \lim_{n_{\text{minipool}} \rightarrow \infty} \mathbb{E}[r(s_2)] \quad (37)$$

For any  $s > 0$ ,  $P(|S(x, \theta)| \leq s) > 0$  (from above) which implies that as  $n_{\text{minipool}} \rightarrow \infty$ ,  $P(s_2 \geq s) \rightarrow 0$ . Thus,

$$s_2 \rightarrow_P 0 \quad (38)$$

Thus, since  $\nabla_\theta \ell(z^{(t)}; \theta) < M_\ell$ ,  $r(s_2)$  is bounded, so if the limit  $\lim_{s \rightarrow 0} r(s)$  exists, then:

$$\lim_{n_{\text{minipool}} \rightarrow \infty} \mathbb{E}[r(s_2)] = \lim_{s \rightarrow 0} r(s) \quad (39)$$

$$\lim_{s \rightarrow 0} r(s) = \lim_{s \rightarrow 0} \mathbb{E}_{|S(x, \theta)| \leq s} [\nabla_{\theta} \ell(z, \theta)] \quad (40)$$

$$= \lim_{s \rightarrow 0} \frac{\int_{|S(x, \theta)| \leq s} \nabla_{\theta} \ell((x, y), \theta) dp^*(x, y)}{\int_{|S(x, \theta)| \leq s} dp^*(x, y)} \quad (41)$$

$$= \lim_{s \rightarrow 0} \frac{\int_{|S(x, \theta)| \leq s} \nabla_{\theta} \psi(yS(x, \theta)) dp^*(x, y)}{\int_{|S(x, \theta)| \leq s} dp^*(x, y)} \quad (42)$$

$$= \lim_{s \rightarrow 0} \frac{\int_{|S(x, \theta)| \leq s} \psi'(yS(x, \theta)) y \nabla_{\theta} S(x, \theta) dp^*(x, y)}{\int_{|S(x, \theta)| \leq s} dp^*(x, y)} \quad (43)$$

$$= \psi'(0) \lim_{s \rightarrow 0} \frac{\int_{|S(x, \theta)| \leq s} y \nabla_{\theta} S(x, \theta) dp^*(x, y)}{\int_{|S(x, \theta)| \leq s} dp^*(x, y)} \quad (44)$$

$$\lim_{s \rightarrow 0} r(s) = \psi'(0) \frac{\lim_{s \rightarrow 0} \frac{1}{s} \int_{|S(x, \theta)| \leq s} y \nabla_{\theta} S(x, \theta) dp^*(x, y)}{\lim_{s \rightarrow 0} \frac{1}{s} \int_{|S(x, \theta)| < s} p(x) dx} \quad (45)$$

The bottom limit exists by 12 and the top limit exists by an adaption of Proposition 12 with replacing the integrand  $p^*(x)$  with  $\nabla_{\theta} S(x, \theta)(p^*(x, y = 1) - p^*(x, y = -1))$  (which is smooth). This can be done by Lemma 11.

The bottom is exactly  $2b(\theta)$ ,

$$\lim_{s \rightarrow 0} r(s) = \frac{\psi'(0)}{2b(\theta)} \lim_{s \rightarrow 0} \frac{1}{s} \int_{|S(x, \theta)| \leq s} y \nabla_{\theta} S(x, \theta) dp^*(x, y) \quad (46)$$

$$= \frac{-\psi'(0)}{b(\theta)} \left[ -\frac{1}{2} \lim_{s \rightarrow 0} \frac{1}{s} \int_{|S(x, \theta)| \leq s} y \nabla_{\theta} S(x, \theta) dp^*(x, y) \right] \quad (47)$$

$$= \frac{-\psi'(0)}{b(\theta)} \nabla Z(\theta) \quad (48)$$

The last line follows from Lemma 13.  $\square$

## 6.5 Descent Direction

**Theorem 9.** Assume that Assumptions 1, 2, 5, 6, and 7 hold, and assume  $\psi'(0) < 0$ . For any  $b_0 > 0$ ,  $\epsilon > 0$ , and  $n$ , for any sufficiently large  $\lambda \geq 2M_{\ell}^{3/2} b_0^{1/2} (-\psi'(0))^{-1/2} \epsilon^{-1/2} n^{2/3}$ , for all iterates of uncertainty sampling  $\{\theta_t\}$  where  $\theta_{t-1} \in \Theta_{\text{regular}}$ ,  $\|\nabla Z(\theta_{t-1})\| \geq \epsilon$ , and  $b(\theta_{t-1}) \leq b_0$ , as  $n_{\text{minipool}} \rightarrow \infty$ ,

$$\nabla Z(\theta_{t-1}) \cdot \mathbb{E}[\theta_t - \theta_{t-1} | \theta_{t-1}] < 0. \quad (49)$$

*Proof.* The first thing to note is that if  $\|\nabla Z(\theta_{t-1})\| > 0$ , then  $b(\theta_{t-1}) > 0$ .

$$\|\nabla Z(\theta_{t-1})\| > 0 \quad (50)$$

$$\| -\frac{1}{2} \lim_{s \rightarrow 0} \frac{1}{s} \int_{|S(x, \theta_{t-1})| \leq s} \nabla S(x, \theta_{t-1}) \mathbb{E}[y|x] p(x) dx \| > 0 \quad (51)$$

$$\lim_{s \rightarrow 0} \frac{1}{s} \int_{|S(x, \theta_{t-1})| \leq s} \|\nabla S(x, \theta_{t-1})\| \mathbb{E}[y|x] p(x) dx > 0 \quad (52)$$

$$\lim_{s \rightarrow 0} \frac{1}{s} \int_{|S(x, \theta_{t-1})| \leq s} M_{\ell} p(x) dx > 0 \quad (53)$$

$$M_{\ell} b(\theta_{t-1}) > 0 \quad (54)$$

$$b(\theta_{t-1}) > 0 \quad (55)$$

$$(56)$$

This will allow us to use Theorem 8 later in the proof.

As in the main text, we have

$$L_t(\theta) = \sum_{i=1}^t \ell(z^{(i)}, \theta) + \lambda \|\theta\|_2^2 \quad (57)$$

Thus,  $L_t(\theta) = L_{t-1}(\theta) + \ell(z^{(t)}, \theta)$  and further  $\nabla L_t(\theta_t) = 0$ . Together, this implies that  $\nabla L_t(\theta_{t-1}) = \nabla \ell(z^{(t)}, \theta_{t-1})$ .

Using the Taylor expansion, for some value  $\theta'$  on the line segment between  $\theta_t$  and  $\theta_{t-1}$ ,

$$0 = \nabla L_t(\theta_t) = \nabla \ell(z^{(t)}, \theta_{t-1}) + \nabla^2 L_t(\theta')(\theta_t - \theta_{t-1}) \quad (58)$$

$$\theta_t - \theta_{t-1} = -[\nabla^2 L_t(\theta')]^{-1} \nabla \ell(z^{(t)}, \theta_{t-1}) \quad (59)$$

$$\|\theta_t - \theta_{t-1}\| \leq \frac{M_\ell}{\lambda} \quad (60)$$

Further, we can do another larger Taylor expansion,

$$0 = \nabla L_t(\theta_t) = \nabla \ell(z^{(t)}, \theta_{t-1}) + \nabla^2 L_t(\theta_{t-1})(\theta_t - \theta_{t-1}) + Q \quad (61)$$

where

$$Q_i = (\theta_t - \theta_{t-1})^T [\nabla^3 L_t(\theta'')]_i (\theta_t - \theta_{t-1}) \quad (62)$$

$$|Q_i| \leq \frac{M_\ell}{\lambda} \|[\nabla^3 L_t(\theta'')]_i\|_F \frac{M_\ell}{\lambda} \quad (63)$$

$$\|Q\| \leq \frac{M_\ell^3 n}{\lambda^2} \quad (64)$$

For simplicity, define  $g = \nabla Z(\theta_{t-1})$ .

From the three-term Taylor expansion,

$$\theta_t - \theta_{t-1} = -[\nabla^2 L_t(\theta_{t-1})]^{-1} (\nabla \ell(z^{(t)}, \theta_{t-1}) + Q) \quad (65)$$

$$-g \cdot (\theta_t - \theta_{t-1}) = g^T [\nabla^2 L_t(\theta_{t-1})]^{-1} (\nabla \ell(z^{(t)}, \theta_{t-1}) + Q) \quad (66)$$

$$= g^T [\nabla^2 L_t(\theta_{t-1})]^{-1} \nabla \ell(z^{(t)}, \theta_{t-1}) + g^T [\nabla^2 L_t(\theta_{t-1})]^{-1} Q \quad (67)$$

$$\geq g^T [\nabla^2 L_t(\theta_{t-1})]^{-1} \nabla \ell(z^{(t)}, \theta_{t-1}) - \|g\| \frac{1}{\lambda} \frac{M_\ell^3 n}{\lambda^2} \quad (68)$$

$$\geq g^T [\nabla^2 L_t(\theta_{t-1})]^{-1} \nabla \ell(z^{(t)}, \theta_{t-1}) - \frac{\|g\| M_\ell^3 n}{\lambda^3} \quad (69)$$

Noting that  $(A + B)^{-1} = A^{-1} - A^{-1}B(A + B)^{-1}$ , we can expand

$$[\nabla^2 L_t(\theta_{t-1})]^{-1} = [\nabla^2 L_{t-1}(\theta_{t-1})]^{-1} - R \quad (70)$$

where  $R = [\nabla^2 L_{t-1}(\theta_{t-1})]^{-1} \nabla^2 \ell(z^{(t)}, \theta_{t-1}) [\nabla^2 L_t(\theta_{t-1})]^{-1}$  and thus  $\|R\| \leq \frac{M_\ell}{\lambda^2}$

$$-g \cdot (\theta_t - \theta_{t-1}) \geq g^T [\nabla^2 L_{t-1}(\theta_{t-1})]^{-1} \nabla \ell(z^{(t)}, \theta_{t-1}) - \frac{\|g\| M_\ell^2}{\lambda^2} - \frac{\|g\| M_\ell^3 n}{\lambda^3} \quad (71)$$

On the right side, the only thing that depends on the randomness at iteration  $t$  is  $\ell(z^{(t)}, \theta_{t-1})$  whose expectation is given by Theorem 8 (this is where we use that  $\theta \in \Theta_{\text{regular}}$  and  $b(\theta) > 0$ ). So taking the expectation for uncertainty sampling and noting  $n_{\text{minipool}} \rightarrow \infty$ ,

$$-g \cdot \mathbb{E}[\theta_t - \theta_{t-1} | \theta_{t-1}] \geq g^T [\nabla^2 L_{t-1}(\theta_{t-1})]^{-1} \frac{-\psi'(0)}{b(\theta_{t-1})} g - \frac{\|g\| M_\ell^2}{\lambda^2} - \frac{\|g\| M_\ell^3 n}{\lambda^3} \quad (72)$$

$$\geq \frac{-\psi'(0)}{b(\theta_{t-1})} \frac{\|g\|^2}{(t-1)M_\ell} - \frac{\|g\| M_\ell^2}{\lambda^2} - \frac{\|g\| M_\ell^3 n}{\lambda^3} \quad (73)$$

$$\geq \frac{-\psi'(0)}{b(\theta_{t-1})} \frac{\|g\|^2}{nM_\ell} - \frac{\|g\| M_\ell^2}{\lambda^2} - \frac{\|g\| M_\ell^3 n}{\lambda^3} \quad (74)$$

$$\geq \frac{\|g\|}{M_\ell n} \left[ \frac{-\psi'(0)}{b(\theta_{t-1})} \|g\| - \frac{M_\ell^3 n}{\lambda^2} - \frac{M_\ell^4 n^2}{\lambda^3} \right] \quad (75)$$

$$\geq \frac{\epsilon}{M_\ell n} \left[ \frac{-\psi'(0)}{b_0} \epsilon - \frac{M_\ell^3 n}{\lambda^2} - \frac{M_\ell^4 n^2}{\lambda^3} \right] \quad (76)$$

$$(77)$$

Therefore, for  $\lambda \geq 2M_\ell^{3/2} b_0^{1/2} (-\psi'(0))^{-1/2} \epsilon^{-1/2} n^{2/3}$  (and ensuring each power is at least 1),

$$-g \cdot \mathbb{E}[\theta_t - \theta_{t-1} | \theta_{t-1}] > 0 \quad (78)$$

Flipping the sign and plugging in  $g$ , we get the result.

□
